# Supplementary material
Source: publisher figshare collection journal article supplement (https://gsajournals.figshare.com/ndownloader/files/22272111)
Supplement: Supplementary file 1 [file 22272111]

**Supplemental Table S2. Oligonucleotides used in this study.**

RT-qPCR Oligos

F1066 *HO* ORF (s) AAATGGAGCGCTCTAAAGGAGAA

F1067 *HO* ORF (as) CTAACCACAGACCAAGCATCCAA

F2430 RPR1 control (s) CACCTATGGGCGGGTTATCAG

F2431 RPR1 control (as) CCTAGGCCGAACTCCGTGA

ChIP-qPCR Oligos

F2085 *HO* Promoter -1871 to -1847 (s) TTGATCTTTACCGTTTAGTTCCAAC

F2086 *HO* Promoter -1693 to -1671 (as) TTGATCTTTACCGTTTAGTTCCAAC

F2089 *HO* Promoter -1640 to -1615 (s) TCCGAAAAGCAATTACTCTCTATGTT

F2090 *HO* Promoter -1442 to -1417 (as) GCGATTGGGTATAATGAAGATTGTTA

F2091 *HO* Promoter -1471 to -1447 (s) AAGCTAAGAATTTCACATGTTGTTG

F2092 *HO* Promoter -1276 to -1251 (as) GTTGAGGTCTTTTCTATTTCTGATTG

F1093 *HO* Promoter -1429 to -1410 (s) TATACCCAATCGCTGCGTGC

F1094 *HO* Promoter -1158 to -1139 (as) AGCCGCCACGAATCAAACTT

F2093 *HO* Promoter -1295 to -1270 (s) AATGCTGGAGCAAAAATTTCAATCAG

F2094 *HO* Promoter -1142 to -1122 (as) GGAGCCCCTCAGACATTAGCC

F2115 *HO* Promoter -1204 to -1184 (s) TCTACGGATGATCTGTGAGAA

F2116 *HO* Promoter -1036 to -1015 (as) CTACGTTAAGACCTGTAACCGA

F2117 *HO* Promoter -1063 to -1044 (s) GAAAGAACCGCAGAGTGCTT

F2118 *HO* Promoter -882 to -860 (as) GAACCTGGTACGTATATTGTGGC

F1960 *HO* Promoter -897 to -878 (s) AAAATATACACAAACGCCAC

F1983 *HO* Promoter -817 to -798 (as) AATCGACGACGGTCACATTA

F2099 *HO* Promoter -839 to -819 (s) TCATACCCTGACTTGGCAAAC

F2100 *HO* Promoter -643 to -620 (as) CTTAAGCCCTGTGTAGGATTGATT

F1962 *HO* Promoter -837 to -818 (s) ATACCCTGACTTGGCAAACC

F1963 *HO* Promoter -757 to -738 (as) GTCGTCGATTAGCGGATCAC

F2101 *HO* Promoter -677 to -655 (s) ATGCAGTTGAAGACATGTGCGTC

F2102 *HO* Promoter -505 to -482 (as) CATAGAAACAGGACTTGCGAACCC

F2105 *HO* Promoter -448 to -423 (s) GGTTTACGAAATGATCCACGAAAATC

F2106 *HO* Promoter -273 to -251 (as) TTTCACACCTAATAACGCCCAGC

F1855 *HO* Promoter -387 to -368 (s) ATGTCATGTCCACATTAACA

F1876 *HO* Promoter -307 to -288 (as) AAGTAGTAGGTACCAATGGT

F996 Control *CLN2* (s) GTTATCAATTCATGCGCGCT

F997 Control *CLN2* (as) AGATCAACATTTCGCAGGTT

F1070 Control *ACT1* (s) CTGCCGGTATTGACCAAACTACTTACAA

F1071 Control *ACT1* (as) GTCAAAGAAGCCAAGATAGAACCACCAA

F1399 IGR-V control (s) GGCTGTCAGAATATGGGGCCGTAGTA

F1400 IGR-V control (as) CACCCCGAAGCTGCTTTCACAATAC

F2127 Control *CLN1* (s) GACGATCCACTAGCGACTTCT

F2128 Control *CLN1* (as) CACGCTGCCTTTACTCCATTC

F3201 IG-1 control (s) TGTCACGTAGGTAAAACACTTGC

F3202 IG-1 control (as) CCTTGATGGCGTGCTTAACT

Epitope Tagging Oligos

F759 *GAL11* Tagging (s)

GAACAATTCAATGTATGGGATTGGAATAATTGGACAAGTGCTACTCGGATCCCCGGGTTAATTAA

F760 *GAL11* Tagging (as)

AAGTAACTTCAAAAGTATCAAAAGTATGGAAACTTCAAATGTTCAGAATTCGAGCTCGTTTAAAC

F732 *GCN5* Tagging (s)

AATAATAAAGTAAAAGAAATACCTGAATATTCTCACCTTATTGATCGGATCCCCGGGTTAATTAA

F733 *GCN5* Tagging (as)

TTTCTTCTTCGAAAGGAATAGTAGCGGAAAAGCTTCTTCTACGCAGAATTCGAGCTCGTTTAAAC

F810 *SRB4* Tagging (s)

CTTCCTACATTTTATTGTCGCTGAGTACATCCAGCAAAAGAAGGTGCGTACGCTGCAGGTCGAC

F811 *SRB4* Tagging (as)

GGCATTCTATGGCAATGTATGTAGGTTTAAGGAGTGACTCAGGATATTAATCGATGAATTCGAGCTCG

F774 *SWI2* Tagging (s)

TCTTTCACAGATGAAGCGGACTCGAGCATGACAGAAGCGAGTGTACGGATCCCCGGGTTAATTAA

F775 *SWI2* Tagging (as)

ATGTTTGTCTACGTATAAACGAATAAGTACTTATATTGCTTTAGGAAGGTAGAATTCGAGCTCGTTTAAAC

F3259 *SWI4* Tagging (s)

GACTCAAAATTGGACGATATAGAAAAGGATTTGAGGGCAAACGCACGGATCCCCGGGTTAATTAA

F3260 *SWI4* Tagging (as)

CTCTGATAATATAGTAAAAATTATTGGTACATTGTGAATTAAAATGAATTCGAGCTCGTTTAAAC

F665 *SWI5* Tagging (s)

AATGGAACGGGGATTATGGTTTCGCCAATGAAAACTAATCAAAGGCGGATCCCCGGGTTAATTAA

F666 *SWI5* Tagging (as)

TGTTACCCACATTCTCCACTCTTCCACAGAAAAAATTCCTAAAGTGAATTCGAGCTCGTTTAAAC

Oligonucleotides are listed in pairs with a sense (s) oligo and an antisense (as) oligo.
